# Supplementary material
Source: Springer Nature journal article supplement (https://www.springermedizin.de/resource/supplementary/12875_2006_236_MOESM1_ESM.pdf/9436568)

Sampling Frame  
570 F + 2771 M = 3341

Selected Sample  
570 F + 1658 M = 2228

Retired: 7 F + 162 M = 169  
Dead: 5 F + 49 M = 54  
Changed Profession: 60 F + 137 M = 197

Study Participants  
498 F + 1310 M = 1808

Refusals: 24 F + 65 M = 89  
Non-respondents: 77 F + 158 M = 235

Respondents to First Mailing  
192 F + 547 M = 739

Respondents to Reminder  
88 F + 232 M = 320

Respondents to Telephone Interview  
117 F + 308 M = 425

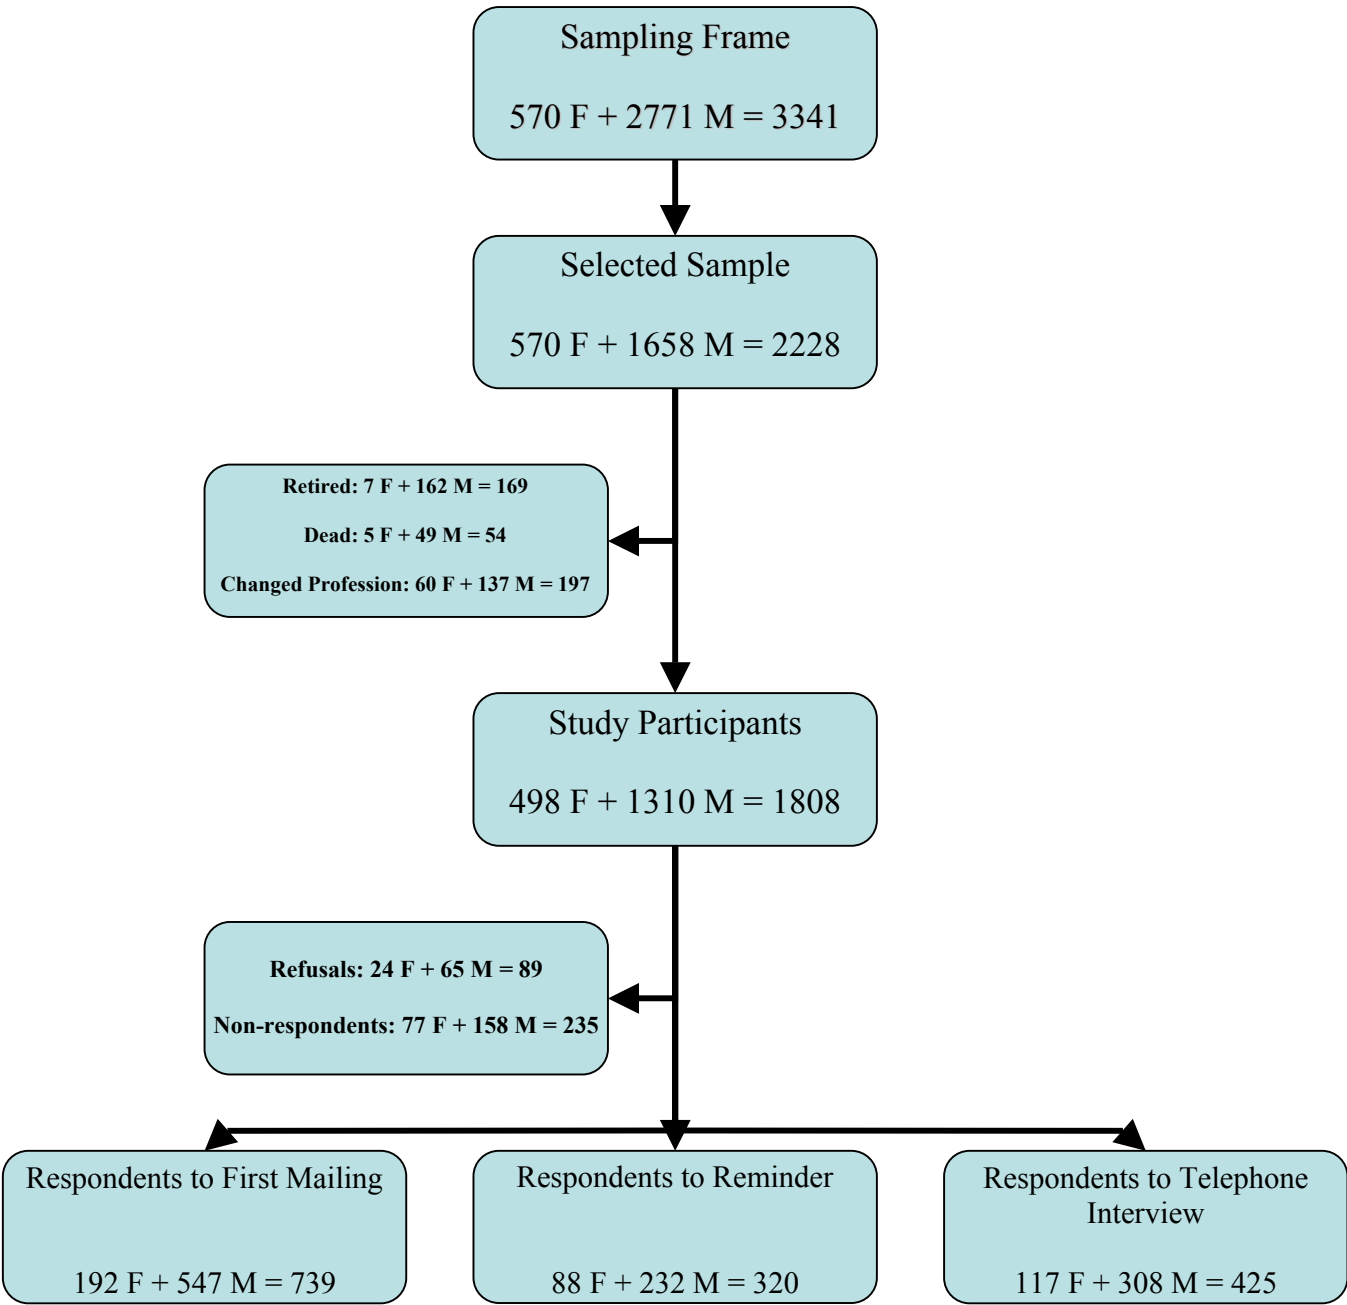

Supplement: MOESM1 [file 9436568]
